# Supplementary material for: Plasma Neurofilament Light (NfL) in Patients Affected by Niemann–Pick Type C Disease (NPCD)
Source: MDPI journal article supplement (doi:10.3390/jcm10204796), 2021-10-19
Supplement: s1 [file s1]

**Supplementary Table S1: Plasma NfL in individual NPCD patients**

| Patient code | Gene | Diagnosis                                                                      | Clinical phenotype | Age at NfL assay (Y) | Neurological signs at NfL assessment                                               | NfL (ng/ml) |
|--------------|------|--------------------------------------------------------------------------------|--------------------|----------------------|------------------------------------------------------------------------------------|-------------|
| NP1          | NPC2 | Genotyping: pathogenetic variant in homozygosity<br>Filipin: classic phenotype | ESL +              | 0.08                 | None                                                                               | 38.24       |
| NP2          | NPC1 | Genotyping: pathogenetic variant in homozygosity<br>Filipin: ND                | ESL +              | 0.17                 | None                                                                               | 73.50       |
| NP3          | NPC1 | Genotyping: 2 pathogenetic variants<br>Filipin: classic phenotype              | Late infantile     | 0.25                 | None                                                                               | 19.26       |
| NP4          | NPC1 | Genotyping: pathogenetic variant in homozygosity<br>Filipin: ND                | Early infantile +  | 3.0                  | Developmental delay, severe hypotonia                                              | 581.43      |
| NP5          | NPC1 | Genotyping: pathogenetic variant in homozygosity<br>Filipin: ND                | Early infantile    | 1.42                 | Developmental delay                                                                | 70.21       |
| NP6          | NPC1 | Genotyping: 2 pathogenetic variants<br>Filipin: classic phenotype              | Late infantile     | 0.42                 | None                                                                               | 27.90       |
|              |      |                                                                                |                    | 5.3                  | Balance problems, clumsiness                                                       | 123.2       |
| NP7          | NPC1 | Genotyping: 2 pathogenetic variants<br>Filipin: ND                             | Late infantile     | 3.5                  | Developmental delay                                                                | 61.29       |
| NP8          | NPC1 | Genotyping: 1 pathogenetic variant; 1 VUS<br>Filipin: classic phenotype        | Late infantile     | 12.0                 | Ophthalmoplegia, dysarthria, dysphagia, intellectual disability, inability to walk | 42.70       |
| NP9          | NPC1 | Genotyping: 1 pathogenetic variant, 1VUS<br>Filipin: variant phenotype         | Juvenile           | 8.5                  | None                                                                               | 14.12       |
|              |      |                                                                                |                    | 9.5                  | None                                                                               | 15.83       |
|              |      |                                                                                |                    | 11.25                | Bilateral hands tremor; mirror movements, dystonia                                 | 28.97       |
| NP9sib       | NPC1 | Genotyping: 1 pathogenetic variant, 1VUS<br>Filipin: variant phenotype         | Juvenile           | 13.08                | None                                                                               | 15.61       |

|          |      |                                                                             |          |       |                                                                                             |       |
|----------|------|-----------------------------------------------------------------------------|----------|-------|---------------------------------------------------------------------------------------------|-------|
| NP11     | NPC2 | Genotyping: 2 pathogenetic variants Filipin: ND                             | NC       | 2.5   | None                                                                                        | 8.82  |
| NP12     | NPC3 | Genotyping: 2 pathogenetic variants Filipin: ND                             | NC       | 0.92  | None                                                                                        | 16.30 |
|          |      |                                                                             |          |       |                                                                                             |       |
| NP13*    | NPC1 | Genotyping: pathogenetic variant in homozygosity Filipin: classic phenotype | Juvenile | 21.58 | Vertical gaze supranuclear ophthalmoplegia                                                  | 40.44 |
| NP13sib* | NPC1 | Genotyping: pathogenetic variant in homozygosity Filipin: ND                | Juvenile | 21.58 | Dysphagia, dysarthria, ataxic gait, vertical gaze supranuclear ophthalmoplegia              | 29.44 |
| NP15     | NPC1 | Genotyping: 2 pathogenetic variants Filipin: classic phenotype              | Juvenile | 21.83 | Epilepsy, ataxia, dysarthria dysphagia, vertical supranuclear gaze palsy, cognitive decline | 11.11 |
|          |      |                                                                             |          | 22.75 |                                                                                             | 10.50 |
| NP16     | NPC1 | Genotyping: pathogenetic variant in homozygosity Filipin: classic phenotype | Juvenile | 20.75 | Gait problems, dysarthria, dysphagia                                                        | 33.1  |
| NP9sib   | NPC1 | Genotyping: 1 pathogenetic variant, 1VUS Filipin: variant phenotype         | Adult    | 19.33 | None                                                                                        | 21.15 |
|          |      |                                                                             |          | 24.83 | Mild tremor, memory problems                                                                | 21.19 |
| NP18     | NPC1 | Genotyping: 2 pathogenetic variants Filipin: classic phenotype              | Adult    | 20.83 | Mild coordination deficit                                                                   | 38.81 |
|          |      |                                                                             |          | 23.42 | None                                                                                        | 26.6  |
|          |      |                                                                             |          | 24.75 | None                                                                                        | 27.4  |
| NP18sib  | NPC1 | Genotyping: 2 pathogenetic variants Filipin: classic phenotype              | Adult    | 26.25 | Dystonia, dysphagia, dysarthria, vertical supranuclear gaze palsy                           | 35.3  |
|          |      |                                                                             |          | 27.5  |                                                                                             | 36.6  |
|          |      |                                                                             |          | 28.42 |                                                                                             | 41.1  |
|          |      |                                                                             |          | 31.17 |                                                                                             | 27.4  |
| NP20     | NPC1 | Genotyping: 1 pathogenetic variant; 1 VUS Filipin: classic phenotype        | Adult    | 37.92 | Dysphagia, dysarthria, coordination problems, vertical supranuclear gaze palsy              | 30.8  |
| NP21     | NPC1 | Genotyping: 2 pathogenetic variants Filipin: classic phenotype              | Adult    | 37.0  | Balance problems, tremors, mild dysphagia                                                   | 62.5  |

|        |      |                                                                                 |       |       |                                                                                                                               |       |
|--------|------|---------------------------------------------------------------------------------|-------|-------|-------------------------------------------------------------------------------------------------------------------------------|-------|
| NP22   | NPC1 | Genotyping:<br>pathogenetic variant<br>in homozygosity<br>Filipin: ND           | Adult | 42.92 | Cataplexy,<br>dysphagia,<br>dysarthria, ataxia,<br>cognitive decline,<br>myoclonus,<br>vertical<br>supranuclear gaze<br>palsy | 24.6  |
| NP9sib | NPC1 | Genotyping: 1<br>pathogenetic<br>variant, 1VUS<br>Filipin: variant<br>phenotype | NC    | 26.08 | None                                                                                                                          | 11.4  |
|        |      |                                                                                 |       | 27.17 | None                                                                                                                          | 21.92 |
| NP9sib | NPC1 | Genotyping: 1<br>pathogenetic<br>variant, 1VUS<br>Filipin: variant<br>phenotype | NC    | 29.08 | None                                                                                                                          | 16.1  |
|        |      |                                                                                 |       | 36.25 | None                                                                                                                          | 14.89 |
| NP25   | NPC1 | Genotyping: 1<br>pathogenetic<br>variant, 1VUS<br>Filipin: variant<br>phenotype | NC    | 39.5  | None                                                                                                                          | 7.59  |
|        |      |                                                                                 |       | 41.17 | None                                                                                                                          | 9.94  |
| NP26   | NPC2 | Genotyping:<br>pathogenetic variant<br>in homozygosity<br>Filipin: ND           | NC    | 53.83 | None                                                                                                                          | 17.71 |

EISL: early infantile severe lethal; EI: early infantile; LI: late infantile; J: juvenile; A: adult; NC: non-classified because of lack of neurological involvement at last follow up [1].

NPCD diagnosis was established by NPC1 and NPC2 genotyping. Biochemical confirmation by filipin staining was done in all patients presenting at least one allele carrying a VUS and whenever available in cases with pathogenetic mutation is both alleles. Patients with at least 1 VUS and presenting a variant biochemical phenotype presented elevated levels of oxysterols and/or or N-palmitoyl-O-phosphocholineserine (PPCS)

Siblings within a family were identified with the same NP number followed by sib

\*twins; + deceased
